# Supplementary material for: CrERF5, an AP2/ERF Transcription Factor, Positively Regulates the Biosynthesis of Bisindole Alkaloids and Their Precursors in Catharanthus roseus
Source: PubMed Central journal article supplement (PMC6657538; doi:10.3389/fpls.2019.00931), 2019-07-18

**A****Flower**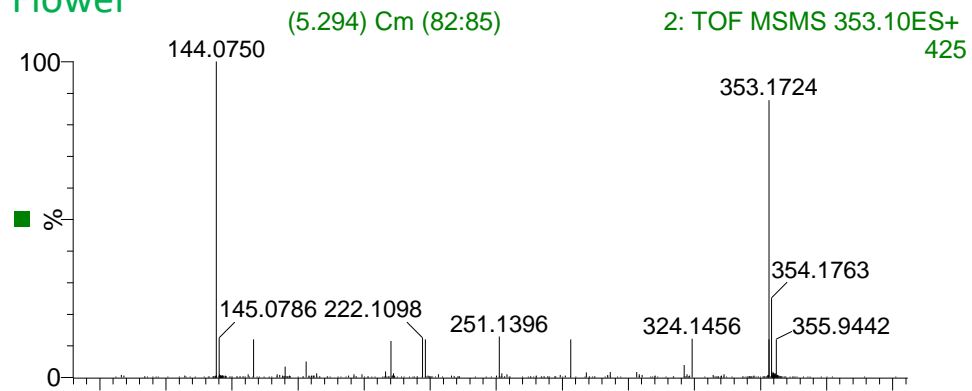**Leaf**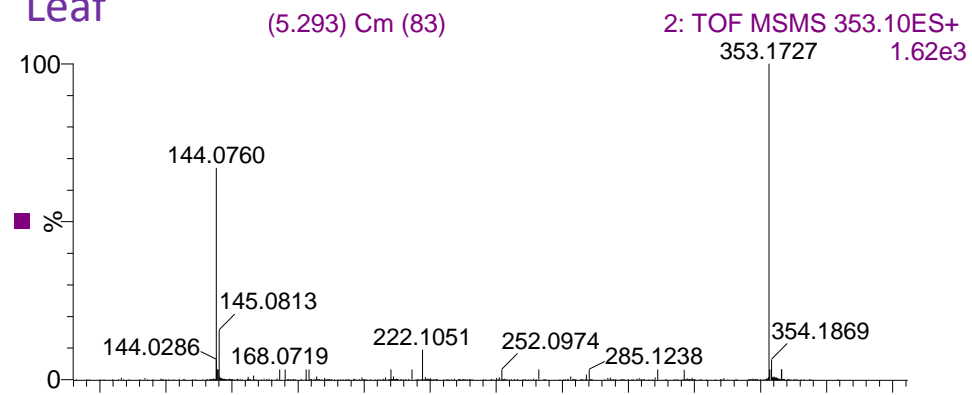**Standard**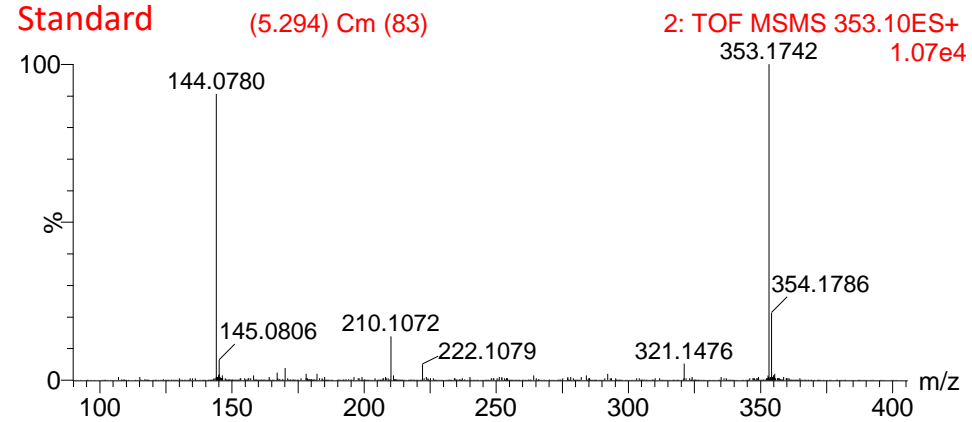**B****Leaf**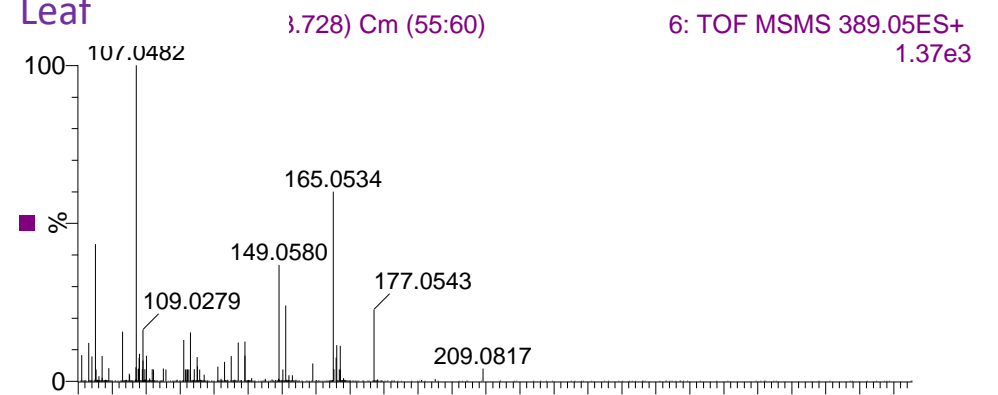**Flower**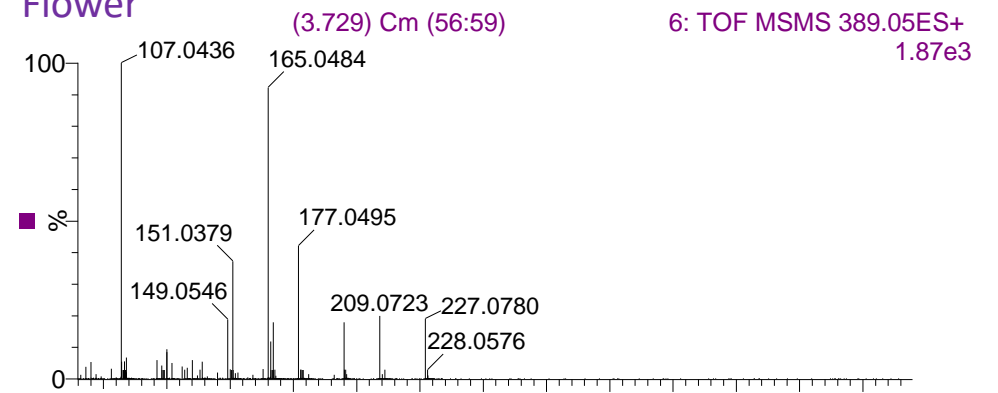**Standard**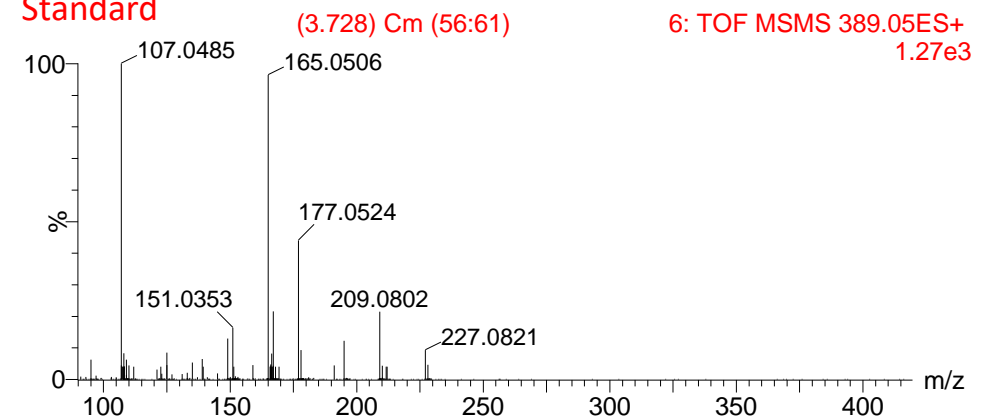

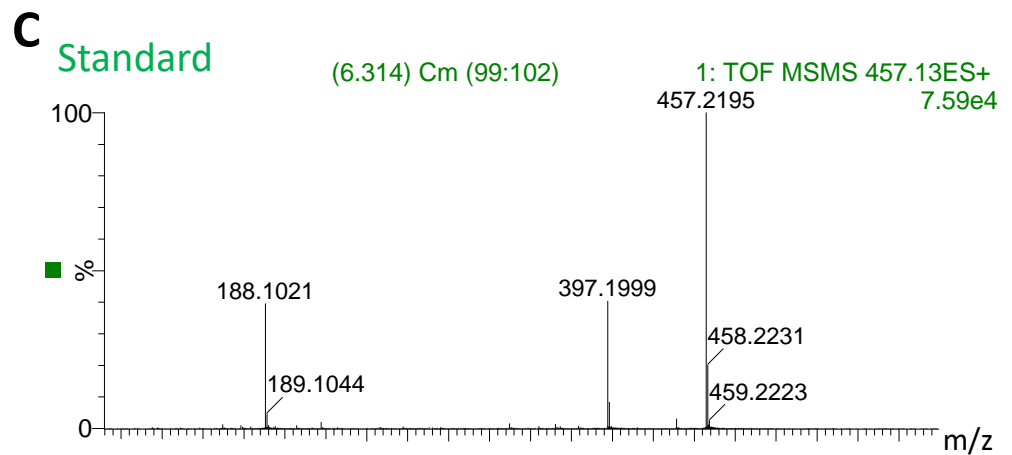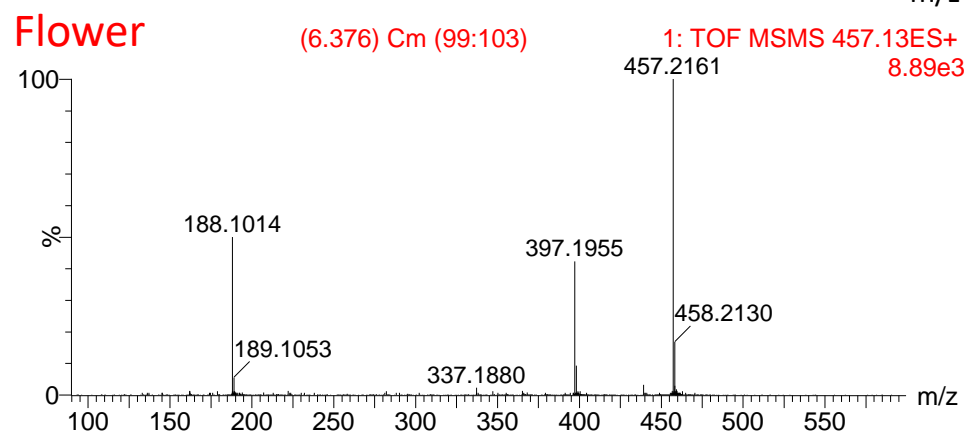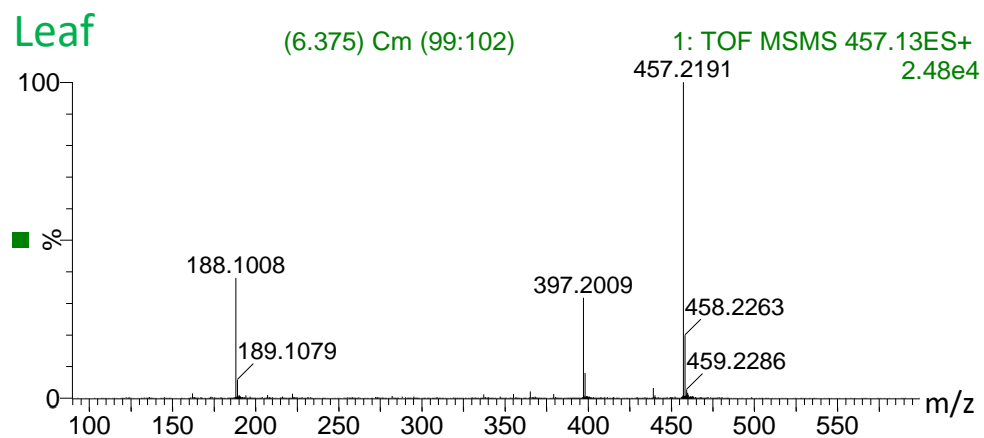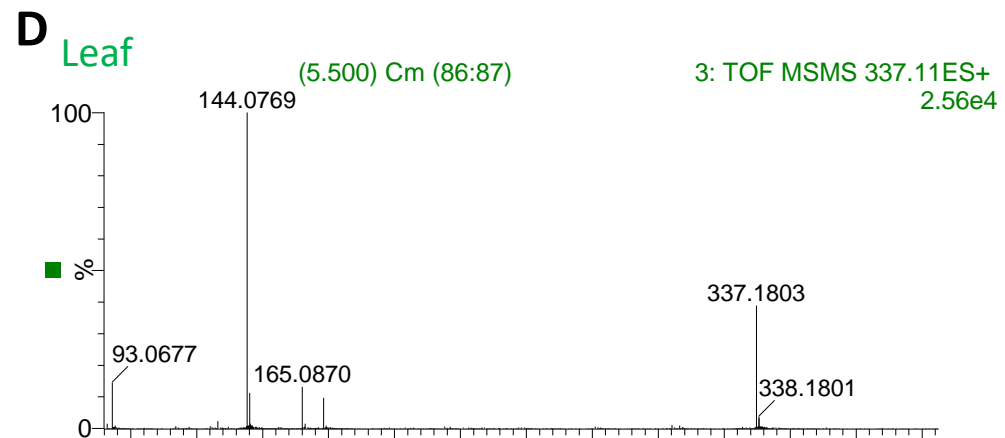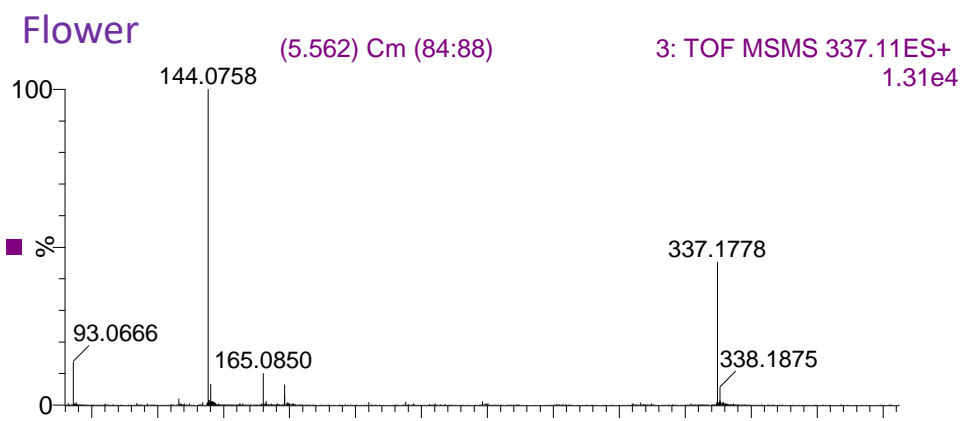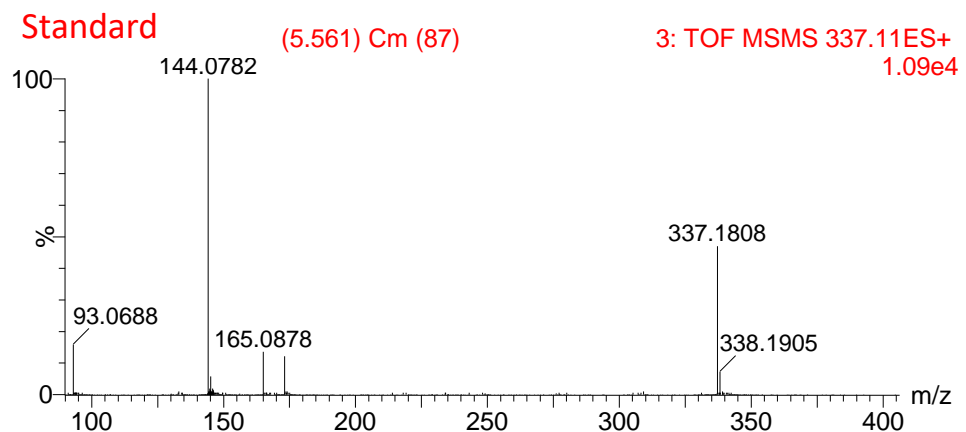

**E**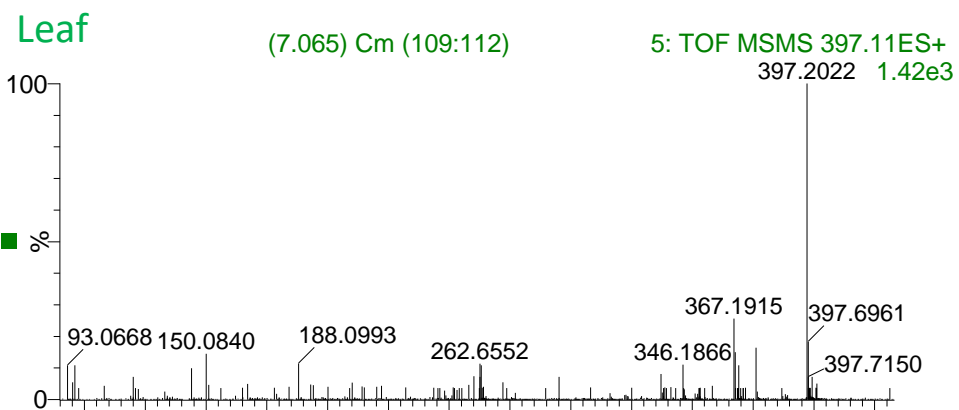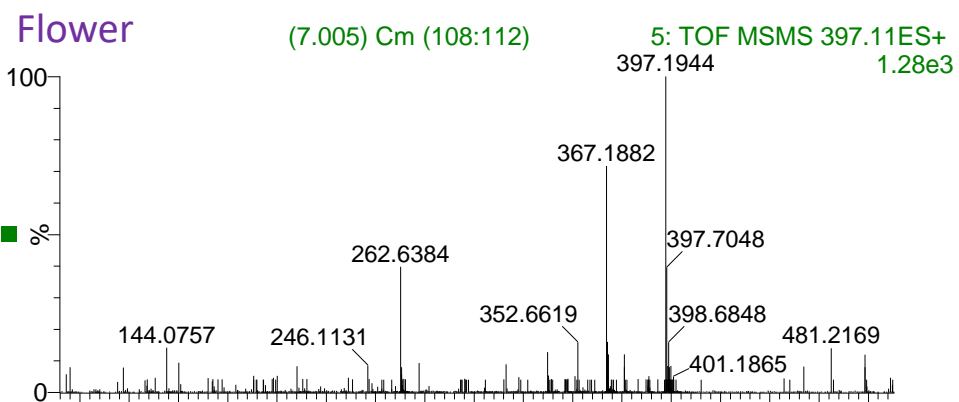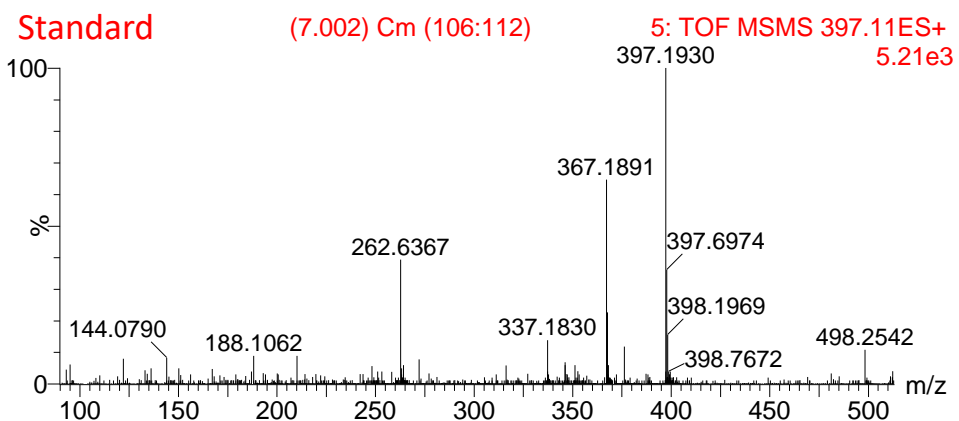**F**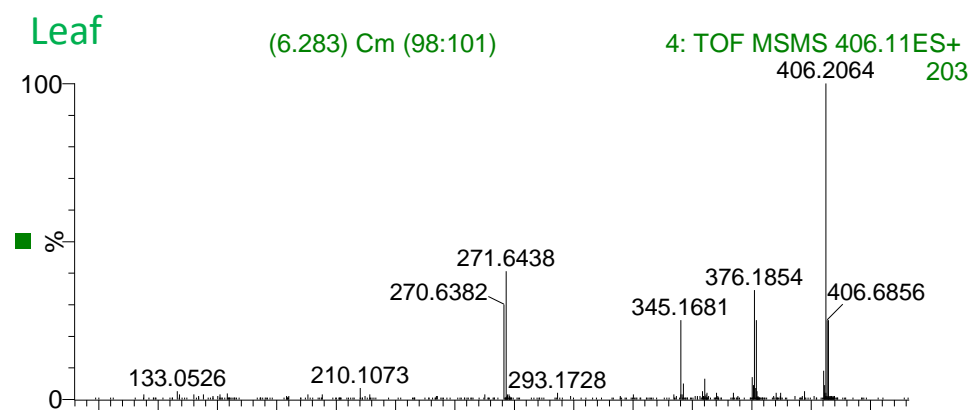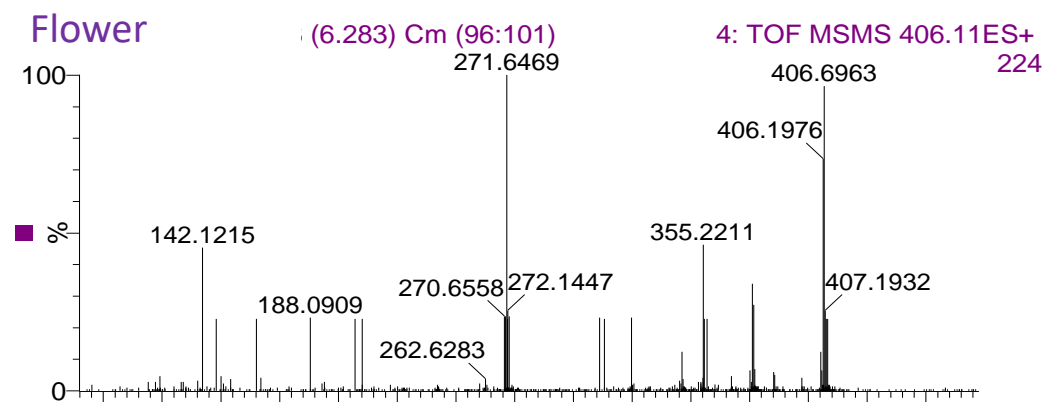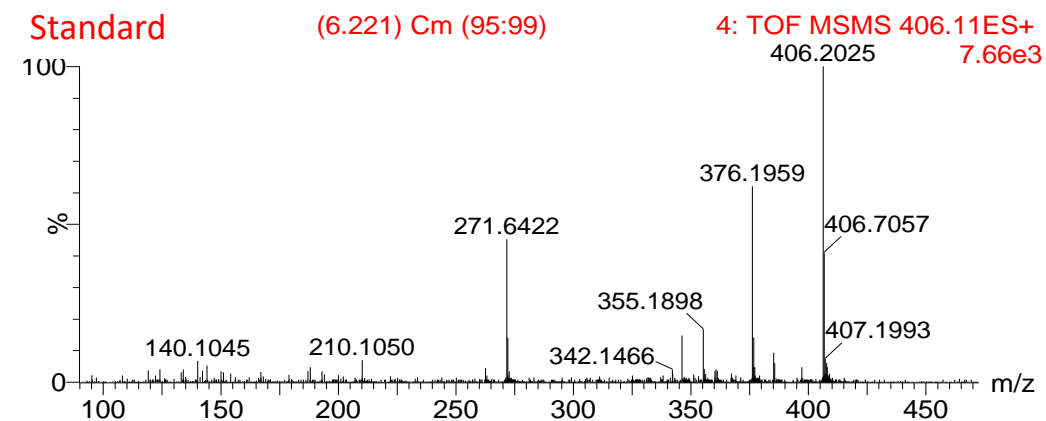

Supplement: Image_2.pdf [file Image_2.pdf]
